# Supplementary material
Source: publisher figshare collection journal article supplement (https://acs.figshare.com/ndownloader/files/17180015)
Supplement: Supplementary file 1 [file 17180015]

# An ionic hydrogel for accelerated dopamine delivery via retrodialysis

Christopher M. Proctor<sup>1</sup>, Chung Yuen Chan<sup>1</sup>, Luca Porcarelli<sup>2</sup>, Esther Udabe<sup>2</sup>, Ana Sanchez-Sanchez<sup>1,2</sup>, Isabel del Agua<sup>2</sup>, David Mecerreyes<sup>2\*</sup>, George G. Malliaras<sup>1\*</sup>

<sup>1</sup>Electrical Engineering Division, Department of Engineering, University of Cambridge, Cambridge CB3 0FA, United Kingdom

<sup>2</sup>POLYMAT University of the Basque Country UPV/EHU, Joxe Mari Korta Center, Avda. Tolosa 72, 20018 Donostia-San Sebastian, Spain

## SUPPORTING INFORMATION

**Synthesis of ionic dopamine acrylate monomer (iDAA):** The synthesis of iDAA was carried out using an anionic exchange resin (AER), Amberlyst A-26 (OH) from Alfa Aesar (exchange capacity 0.8 mol/l). An excess (>10% p/V) of commercial acrylic acid (Sigma Aldrich) in water and 0.05M of dopamine chloride (Alfa Aesar) in methanol. The AER column was loaded with an excess of acrylic acid solution (>10% p/V). Then, a 0.05M dopamine chloride solution in methanol was passed slowly through the column. The final product, dopamine acrylate (iDAA), was collected in the form of a methanol solution. Methanol was removed under reduced pressure, and the iDAA was characterized by <sup>1</sup>H NMR (400 MHz, Deuterium Oxide) δ 6.86 – 6.69 (m, 3H, aromatic), 6.13 – 5.60 (m, 3H, CH<sub>2</sub>=CH), 3.17 (t, 2H, CH<sub>2</sub>-CH<sub>2</sub>-NH<sub>3</sub>), 2.82 (t, 2H, CH<sub>2</sub>-CH<sub>2</sub>-NH<sub>3</sub>).

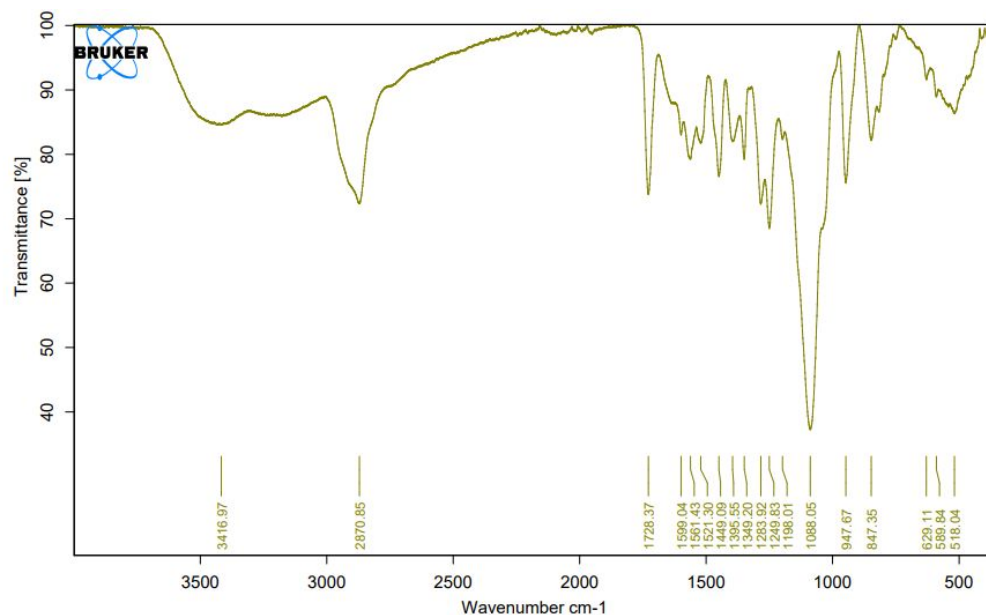

**Figure S1** shows the FTIR-ATR spectrum of the as-synthesized PEG-based hydrogels. The distinctive signals of the polymer backbone were observed, corresponding to the ester carbonyl stretch at 1729 cm<sup>-1</sup> and the ether stretch at 1088 cm<sup>-1</sup>. In addition, CH stretches at 2870 cm<sup>-1</sup>, and the CH<sub>2</sub> bending stretches at 1449 cm<sup>-1</sup> were also observed. We attributed the broad band at 3416 cm<sup>-1</sup> to the presence of water in the sample. The characteristic bands of dopamine were also present in the spectra with the amine bending and stretching modes at 1599 and 3300 cm<sup>-1</sup>. Finally, quantitative monomer conversion

was demonstrated by the absence of the characteristic C=C stretch bands in the fingerprint region at 1640 and 660  $\text{cm}^{-1}$ .

---

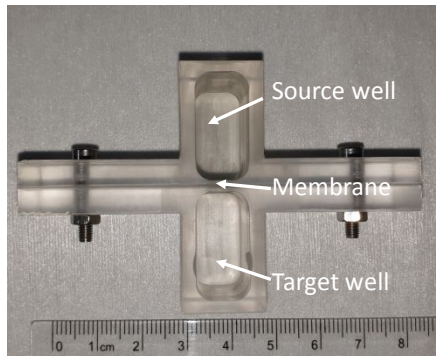

**Figure S2:** Custom made sample holder used for diffusion experiments featuring the Source and Target wells sandwiching the Membrane.

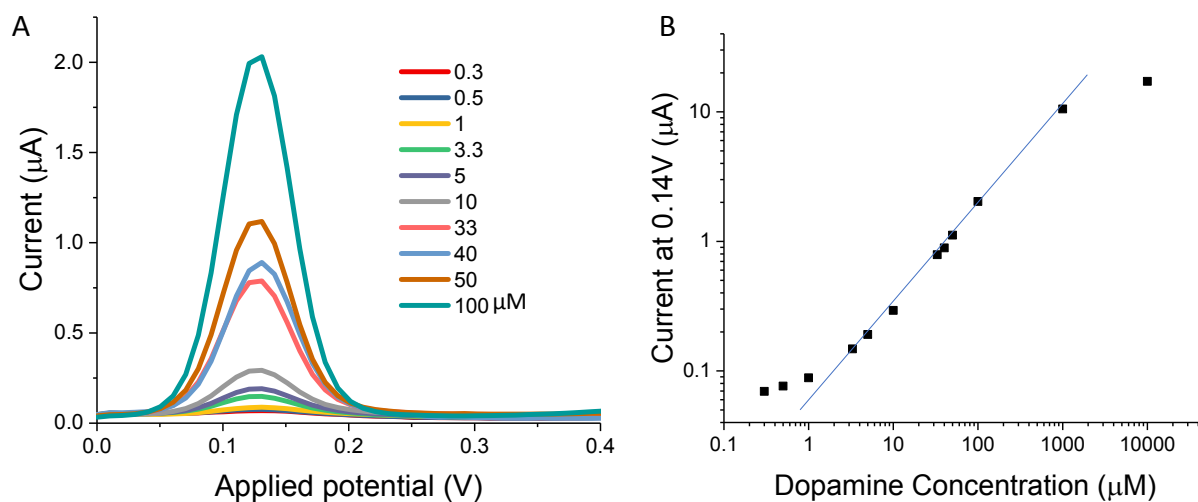

**Figure S3:** Example current vs potential (A) and calibration curve showing linear regime (B) from DPV experiments for dopamine concentrations from 0.3 to 100  $\mu\text{M}$ . DPV measurements were performed using a three electrode configuration with a glassy carbon working electrode, Pt-wire counter electrode and Ag/AgCl reference electrode using an Metrohm Autolab Potentiostat (model PGSTAT128N).

---
